# Supplementary material for: Sildenafil Citrate Influences Production of TNF-α in Healthy Men Lymphocytes
Source: PubMed Central journal article supplement (PMC6930755; doi:10.1155/2019/8478750), 2019-10-22
Supplement: 8478750.f1.pdf [file 8478750.f1.pdf]

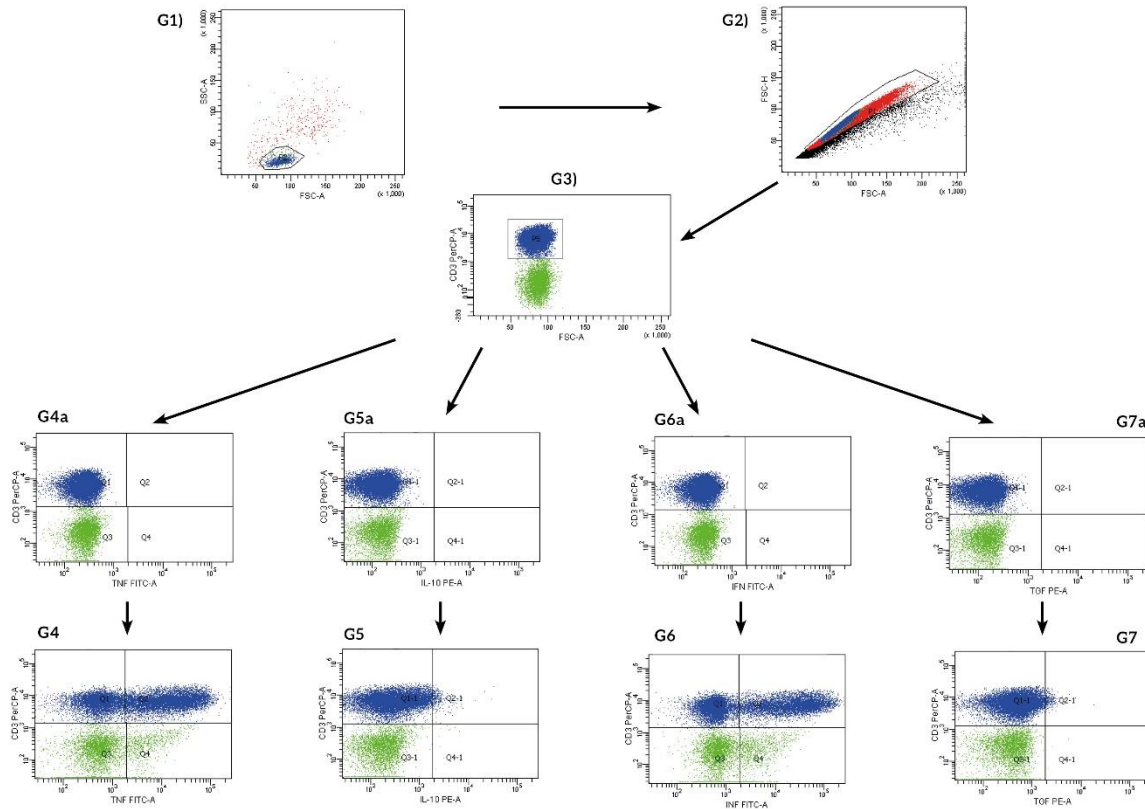

Supplementary data to figure 1: Lymphocytes after PMA stimulation. Gating strategy: lymphocytes were identified on FSC/SSC dot plot G1 as cells within  $50-100 \times 10^3$  on FSC and below  $50 \times 10^3$  on SSC. G2) doublets exclusion. G3) CD3 positive cells (T lymphocytes were identified as events with PreCP fluorescence above  $10^3$  on logarithmic scale G4) TNF -  $\alpha$  positive T lymphocytes were identified as CD3<sup>+</sup> lymphocytes from G3 gate with fluorescence higher than fluorescence minus one from G4a. G5) IL-10 positive T lymphocytes were identified as CD3<sup>+</sup> lymphocytes from G3 gate with fluorescence higher than fluorescence minus one from G5a. G6) INF -  $\gamma$  positive T lymphocytes were identified as CD3<sup>+</sup> lymphocytes from G3 gate with fluorescence higher than fluorescence minus one from G6a. G7) TGF -  $\beta$  positive T lymphocytes were identified as CD3<sup>+</sup> lymphocytes from G3 gate with fluorescence higher than fluorescence minus one from G7a. FMO controls are represented on G4a, G5a, G6a, G7a, G8a dot plots.

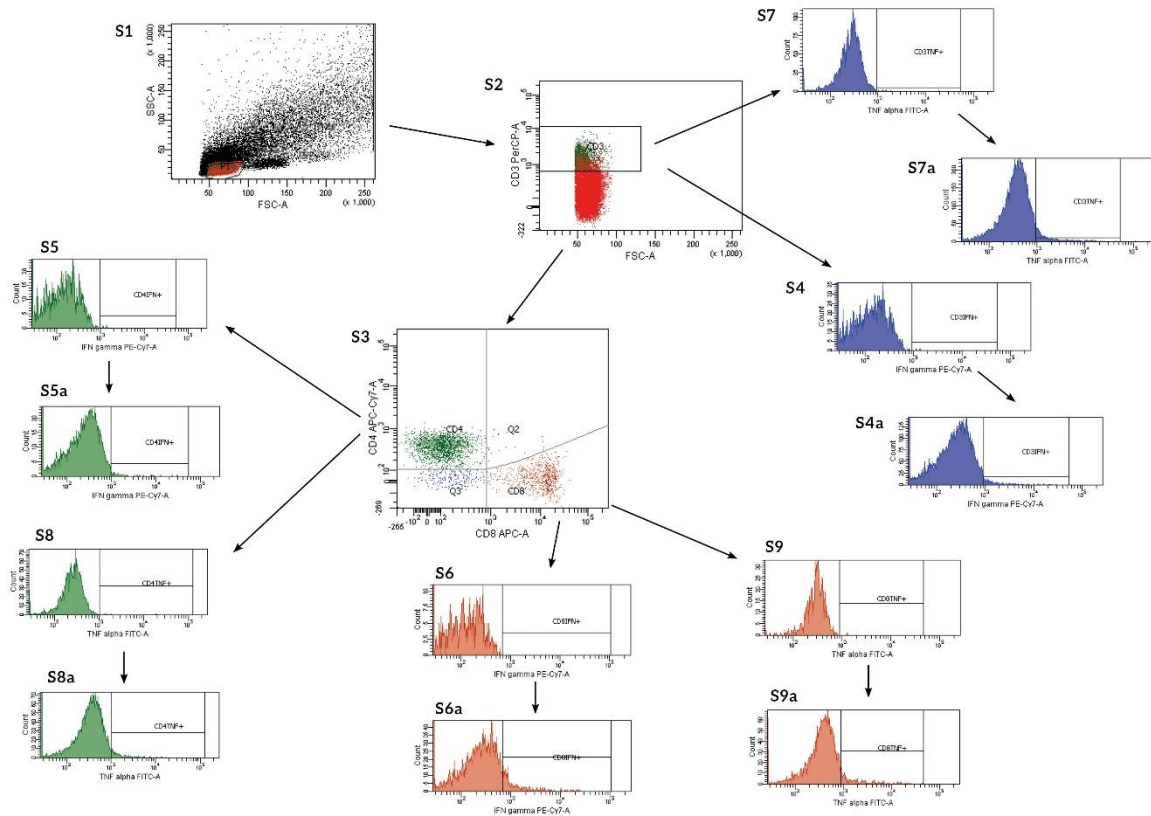

Supplementary data to figure 2: Lymphocytes after PHA stimulation. Gating strategy: lymphocytes were identified on FSC/SSC dot plot S1) as cells within  $50-100 \times 10^3$  on FSC and below  $50 \times 10^3$  on SSC, S2) CD3 positive cells ( T lymphocytes were identified as events with PreCP fluorescence above  $10^3$  on logarithmic scale S3) CD4 positive cells ( T helper lymphocytes were identified as events with APC-Cy7 fluorescence above  $10^2$  on logarithmic scale and CD8 positive cells (T cytotoxic lymphocytes were identified as events with APC fluorescence above  $10^3$  on logarithmic scale. IFN –  $\gamma$ <sup>pos</sup> cells were identified as cells positive for PeCy7 above  $10^3$  respectively from gate CD3 (S4a), CD4(S5a), CD8(S6a). TNF - $\alpha$ <sup>pos</sup> cells were identified as cells positive for PeCy7 above  $10^3$  respectively from gate CD3(S7a), CD4(S8a), CD8(S9a). FMO controls are represented on S4, S5, S6, S7, S8 histograms.
